# Supplementary material for: Reactivity of N-Heterocyclic Stannylenes: Oxidative Addition of Chalcogen Elements to a Chiral NH-Sn System
Source: MDPI journal article supplement (doi:10.3390/inorganics11080318), 2023-07-27
Supplement: s1 [file s1]

# Reactivity of N-Heterocyclic Stannylenes: Oxidative Addition of Chalcogen Elements to a Chiral NH-Sn System

Kerry R. Flanagan <sup>1</sup>, James D. Parish <sup>1</sup>, Gabriele Kociok-Köhn <sup>2</sup> and Andrew L. Johnson <sup>1,\*</sup>

<sup>1</sup> Department of Chemistry, University of Bath, Claverton Down, Bath BA2 7AY, UK

<sup>2</sup> Material and Chemical Characterisation Facility (MC<sup>2</sup>), University of Bath, Claverton Down, Bath BA2 7AY, UK

\* Correspondence: a.l.johnson@bath.ac.uk

## Supplementary Information

**Table S1:** Experimental Single-crystal X-ray crystallographic parameters for complexes **2-6**

| Compound reference                                                     | <b>2</b>                                                       | <b>3</b>                                                                                                              | <b>4</b>                                                                      | <b>5</b>                                                                       | <b>6</b>                                                                       |
|------------------------------------------------------------------------|----------------------------------------------------------------|-----------------------------------------------------------------------------------------------------------------------|-------------------------------------------------------------------------------|--------------------------------------------------------------------------------|--------------------------------------------------------------------------------|
| Chemical formula                                                       | C <sub>20</sub> H <sub>44</sub> N <sub>4</sub> Sn <sub>2</sub> | C <sub>36</sub> H <sub>78</sub> N <sub>6</sub> O <sub>3</sub> Sn <sub>3</sub> ·<br>½(C <sub>6</sub> H <sub>14</sub> ) | C <sub>24</sub> H <sub>52</sub> N <sub>4</sub> S <sub>2</sub> Sn <sub>2</sub> | C <sub>24</sub> H <sub>52</sub> N <sub>4</sub> Se <sub>2</sub> Sn <sub>2</sub> | C <sub>24</sub> H <sub>52</sub> N <sub>4</sub> Sn <sub>2</sub> Te <sub>2</sub> |
| Formula Mass                                                           | 577.97                                                         | 1042.19                                                                                                               | 698.19                                                                        | 791.99                                                                         | 889.27                                                                         |
| Crystal system                                                         | Monoclinic                                                     | Triclinic                                                                                                             | Monoclinic                                                                    | Monoclinic                                                                     | Monoclinic                                                                     |
| <i>a</i> /Å                                                            | 9.91798(14)                                                    | 10.8990(4)                                                                                                            | 9.32547(18)                                                                   | 9.38243(8)                                                                     | 9.45210(6)                                                                     |
| <i>b</i> /Å                                                            | 13.5756(2)                                                     | 16.4550(4)                                                                                                            | 17.0121(3)                                                                    | 17.04431(14)                                                                   | 17.30526(10)                                                                   |
| <i>c</i> /Å                                                            | 19.0840(3)                                                     | 16.5995(4)                                                                                                            | 9.87122(18)                                                                   | 9.86411(8)                                                                     | 9.95026(6)                                                                     |
| <i>α</i> /°                                                            | 90                                                             | 119.163(3)                                                                                                            | 90                                                                            | 90                                                                             | 90                                                                             |
| <i>β</i> /°                                                            | 95.5413(14)                                                    | 103.209(3)                                                                                                            | 95.9146(17)                                                                   | 95.8668(7)                                                                     | 96.0099(6)                                                                     |
| <i>γ</i> /°                                                            | 90                                                             | 95.724(2)                                                                                                             | 90                                                                            | 90                                                                             | 90                                                                             |
| Unit cell volume/Å <sup>3</sup>                                        | 2557.51(7)                                                     | 2451.59(14)                                                                                                           | 1557.69(5)                                                                    | 1569.18(2)                                                                     | 1618.629(17)                                                                   |
| Temperature/K                                                          | 150(2)                                                         | 150(2)                                                                                                                | 150(2)                                                                        | 150(2)                                                                         | 150(2)                                                                         |
| Space group                                                            | <i>P</i> 21/ <i>c</i>                                          | <i>P</i> $\bar{1}$                                                                                                    | <i>P</i> 21/ <i>n</i>                                                         | <i>P</i> 21/ <i>n</i>                                                          | <i>P</i> 21/ <i>n</i>                                                          |
| No. of formula units per unit cell, <i>Z</i>                           | 4                                                              | 2                                                                                                                     | 2                                                                             | 2                                                                              | 2                                                                              |
| Radiation type                                                         | Mo Kα                                                          | Cu Kα                                                                                                                 | Mo Kα                                                                         | Cu Kα                                                                          | Cu Kα                                                                          |
| Absorption coefficient, μ/mm <sup>-1</sup>                             | 1.964                                                          | 12.344                                                                                                                | 1.755                                                                         | 15.433                                                                         | 26.329                                                                         |
| No. of reflections measured                                            | 115034                                                         | 43453                                                                                                                 | 37439                                                                         | 16083                                                                          | 32107                                                                          |
| No. of independent reflections                                         | 5854                                                           | 8999                                                                                                                  | 3581                                                                          | 3140                                                                           | 3247                                                                           |
| <i>R</i> <sub>int</sub>                                                | 0.0554                                                         | 0.0537                                                                                                                | 0.0567                                                                        | 0.0305                                                                         | 0.0621                                                                         |
| Final <i>R</i> <sub>1</sub> ( <i>I</i> > 2σ( <i>I</i> ))               | 0.0352                                                         | 0.0443                                                                                                                | 0.0219                                                                        | 0.0200                                                                         | 0.0254                                                                         |
| Final <i>wR</i> ( <i>F</i> <sup>2</sup> ) ( <i>I</i> > 2σ( <i>I</i> )) | 0.0772                                                         | 0.1222                                                                                                                | 0.0476                                                                        | 0.0488                                                                         | 0.0675                                                                         |
| Final <i>R</i> <sub>1</sub> (all data)                                 | 0.0397                                                         | 0.0499                                                                                                                | 0.0234                                                                        | 0.0204                                                                         | 0.0258                                                                         |
| Final <i>wR</i> ( <i>F</i> <sup>2</sup> ) (all data)                   | 0.0792                                                         | 0.1274                                                                                                                | 0.0482                                                                        | 0.0490                                                                         | 0.0679                                                                         |
| Goodness of fit on <i>F</i> <sup>2</sup>                               | 1.126                                                          | 1.057                                                                                                                 | 1.133                                                                         | 1.115                                                                          | 1.159                                                                          |
| CCDC number                                                            | 2259200                                                        | 2259201                                                                                                               | 2259202                                                                       | 2259203                                                                        | 2259204                                                                        |
